# Supplementary material for: Intramedullary Nail vs. Plate Fixation for Pathological Humeral Shaft Fracture: An Updated Narrative Review and Meta-Analysis of Surgery-Related Factors
Source: MDPI journal article supplement (doi:10.3390/jcm13030755), 2024-01-28
Supplement: s1 [file s1]

| Table S1: The Newcastle-Ottawa Scale (NOS) of the included studies |                                                |                                        |                                   |                                                                       |                             |                      |                               |                                 |                              |       |
|--------------------------------------------------------------------|------------------------------------------------|----------------------------------------|-----------------------------------|-----------------------------------------------------------------------|-----------------------------|----------------------|-------------------------------|---------------------------------|------------------------------|-------|
| Study                                                              | Selection                                      |                                        |                                   |                                                                       | Comparability               |                      | Outcome                       |                                 |                              | Total |
|                                                                    | Representativ<br>e of the<br>exposed<br>cohort | Selection<br>of<br>external<br>control | Ascertain-<br>ment of<br>exposure | Outcome of<br>interest not<br>present at the<br>start of the<br>study | Comparability of<br>cohorts |                      | Assessme<br>nt of<br>outcomes | Sufficient<br>follow-up<br>time | Adequacy<br>of follow-<br>up |       |
|                                                                    |                                                |                                        |                                   |                                                                       | Main<br>factor              | Additional<br>factor |                               |                                 |                              |       |
| Dijkstra et al. [1996] [1]                                         | +                                              | +                                      | +                                 | +                                                                     | -                           | -                    | +                             | +                               | +                            | 7     |
| Sarahrudi et al. [2009] [3]                                        | +                                              | +                                      | +                                 | -                                                                     | -                           | -                    | +                             | -                               | +                            | 5     |
| Wedin et al. [2012] [13]                                           | +                                              | +                                      | +                                 | +                                                                     | -                           | -                    | +                             | -                               | +                            | 6     |
| Schwabe et al. [2014] [17]                                         | +                                              | +                                      | +                                 | +                                                                     | -                           | -                    | +                             | -                               | +                            | 6     |
| Janssen et al. [2016] [12]                                         | +                                              | +                                      | +                                 | +                                                                     | -                           | -                    | +                             | +                               | +                            | 7     |

|                            |   |   |   |   |   |   |   |   |   |   |
|----------------------------|---|---|---|---|---|---|---|---|---|---|
| Casadei et al. [2018] [14] | + | + | + | + | - | - | + | + | + | 7 |
| Zhao et al. [2021] [9]     | + | + | + | + | - | - | + | + | + | 7 |
| Ricard et al. [2021] [16]  | + | + | + | + | - | - | + | + | + | 7 |
| Koob et al. [2022] [15]    | + | + | + | + | - | - | + | + | - | 6 |
